# Supplementary material for: Bacterial diversity and composition on the rinds of specific melon cultivars and hybrids from across different growing regions in the United States
Source: PubMed Central journal article supplement (PMC11008840; doi:10.1371/journal.pone.0293861), 2024-04-11
Supplement: pone.0293861.s006.pdf [file pone.0293861.s006.pdf]

**S1 Table. Core bacterial families of netted and non-netted melons**

| <b>Netting Type</b> | <b>Bacterial Family</b>                                                     |
|---------------------|-----------------------------------------------------------------------------|
| Non-netted          | <i>Pseudomonadaceae</i><br><i>Bacillaceae</i><br><i>[Exiguobacteraceae]</i> |
| Netted              | None                                                                        |
