# Supplementary material for: Bacterial diversity and composition on the rinds of specific melon cultivars and hybrids from across different growing regions in the United States
Source: PubMed Central journal article supplement (PMC11008840; doi:10.1371/journal.pone.0293861), 2024-04-11
Supplement: pone.0293861.s007.pdf [file pone.0293861.s007.pdf]

**S2 Table. Core bacterial families of netted melons**

| <b>Location</b>        | <b>Bacterial Family</b>                       |                          |
|------------------------|-----------------------------------------------|--------------------------|
| Arizona                | None                                          |                          |
| California             | <i>Leuconostocaceae</i><br><i>Bacillaceae</i> |                          |
| Texas-Uvalde           | <i>Enterobacteriaceae</i>                     |                          |
| Texas-Weslaco          | <i>[Exiguobacteraceae]</i>                    | <i>Oxalobacteraceae</i>  |
|                        | <i>Bacillaceae</i>                            | <i>Paenibacillaceae</i>  |
|                        | <i>Caulobacteraceae</i>                       | <i>Planococcaceae</i>    |
|                        | <i>Enterobacteriaceae</i>                     | <i>Pseudomonadaceae</i>  |
|                        | <i>Microbacteriaceae</i>                      | <i>Rhizobiaceae</i>      |
|                        | <i>Micrococcaceae</i>                         | <i>Sphingomonadaceae</i> |
|                        | <i>Moraxellaceae</i>                          | <i>Streptomycetaceae</i> |
| <i>Nocardioidaceae</i> | <i>Xanthomonadaceae</i>                       |                          |
| North Carolina         | None                                          |                          |
| Georgia                | <i>[Exiguobacteraceae]</i>                    | <i>Microbacteriaceae</i> |
|                        | <i>Enterobacteriaceae</i>                     | <i>Pseudomonadaceae</i>  |
|                        | <i>Methylobacteriaceae</i>                    | <i>Sphingomonadaceae</i> |
| Indiana                | <i>Enterobacteriaceae</i>                     | <i>Nocardioidaceae</i>   |
|                        | <i>Methylobacteriaceae</i>                    | <i>Pseudomonadaceae</i>  |
|                        | <i>Microbacteriaceae</i>                      | <i>Sphingomonadaceae</i> |
|                        | <i>Nocardiaceae</i>                           | <i>Xanthomonadaceae</i>  |
