# Supplementary material for: Bacterial diversity and composition on the rinds of specific melon cultivars and hybrids from across different growing regions in the United States
Source: PubMed Central journal article supplement (PMC11008840; doi:10.1371/journal.pone.0293861), 2024-04-11
Supplement: pone.0293861.s008.pdf [file pone.0293861.s008.pdf]

**S3 Table. Core bacterial families of non-netted melons**

| Location       | Bacterial Family           |                           |
|----------------|----------------------------|---------------------------|
| Arizona        | <i>[Exiguobacteraceae]</i> | <i>Nocardiaceae</i>       |
|                | <i>Bacillaceae</i>         | <i>Nocardiodaceae</i>     |
|                | <i>Bradyrhizobiaceae</i>   | <i>Nocardiopsaceae</i>    |
|                | <i>Comamonadaceae</i>      | <i>Planococcaceae</i>     |
|                | <i>Dermabacteraceae</i>    | <i>Pseudonocardiaceae</i> |
|                | <i>Geodermatophilaceae</i> | <i>Rhodobacteraceae</i>   |
| California     | <i>[Exiguobacteraceae]</i> | <i>Moraxellaceae</i>      |
|                | <i>Bacillaceae</i>         | <i>Planococcaceae</i>     |
|                | <i>Enterobacteriaceae</i>  | <i>Pseudomonadaceae</i>   |
|                | <i>Leuconostocaceae</i>    | <i>Xanthomonadaceae</i>   |
|                | <i>Micrococcaceae</i>      |                           |
| Texas-Uvalde   | <i>[Exiguobacteraceae]</i> | <i>Moraxellaceae</i>      |
|                | <i>Enterobacteriaceae</i>  | <i>Nocardiodaceae</i>     |
|                | <i>Microbacteriaceae</i>   | <i>Oxalobacteraceae</i>   |
|                | <i>Micrococcaceae</i>      | <i>Pseudomonadaceae</i>   |
| Texas-Weslaco  | <i>[Exiguobacteraceae]</i> | <i>Nocardiodaceae</i>     |
|                | <i>[Weeksellaceae]</i>     | <i>Oxalobacteraceae</i>   |
|                | <i>Bacillaceae</i>         | <i>Planococcaceae</i>     |
|                | <i>Deinococcaceae</i>      | <i>Pseudomonadaceae</i>   |
|                | <i>Enterobacteriaceae</i>  | <i>Rhodobacteraceae</i>   |
|                | <i>Microbacteriaceae</i>   | <i>Sphingomonadaceae</i>  |
|                | <i>Micrococcaceae</i>      | <i>Xanthomonadaceae</i>   |
|                | <i>Moraxellaceae</i>       |                           |
| North Carolina | <i>Bacillaceae</i>         | <i>Microbacteriaceae</i>  |
|                | <i>Enterobacteriaceae</i>  | <i>Pseudomonadaceae</i>   |
|                | <i>Methylobacteriaceae</i> | <i>Sphingomonadaceae</i>  |
| Georgia        | <i>Bacillaceae</i>         | <i>Microbacteriaceae</i>  |
|                | <i>Caulobacteraceae</i>    | <i>Nocardiaceae</i>       |
|                | <i>Geodermatophilaceae</i> | <i>Sphingomonadaceae</i>  |
|                | <i>Methylobacteriaceae</i> |                           |
| Indiana        | <i>[Exiguobacteraceae]</i> | <i>Micrococcaceae</i>     |
|                | <i>Bacillaceae</i>         | <i>Moraxellaceae</i>      |
|                | <i>Caulobacteraceae</i>    | <i>Nocardiaceae</i>       |
|                | <i>Enterobacteriaceae</i>  | <i>Nocardiodaceae</i>     |
|                | <i>Methylobacteriaceae</i> | <i>Oxalobacteraceae</i>   |
|                | <i>Microbacteriaceae</i>   |                           |
