# Supplementary material for: Bacterial diversity and composition on the rinds of specific melon cultivars and hybrids from across different growing regions in the United States
Source: PubMed Central journal article supplement (PMC11008840; doi:10.1371/journal.pone.0293861), 2024-04-11
Supplement: pone.0293861.s009.pdf [file pone.0293861.s009.pdf]

**S4 Table. Core bacterial families of Arizona and California melons**

| <b>Melon Type</b> | <b>Bacterial Family</b>                                                                         |
|-------------------|-------------------------------------------------------------------------------------------------|
| Non-netted melons | <i>[Exiguobacteraceae]</i><br><i>Bacillaceae</i> <i>Micrococcaceae</i><br><i>Planococcaceae</i> |
| Netted melons     | None                                                                                            |
